# Supplementary material for: Hydrological Regime Shifts in River-Connected Lakes under Upstream Dam Regulation: Insights from the Three Gorges Project and Poyang Lake
Source: Copernicus journal article supplement (doi:10.5194/egusphere-2025-5355), 2026-01-26
Supplement: Supplementary file [file Swat table.pdf › reply on rc1/Swat table.pdf]

Table Parameter Settings for SWAT Model Calibration of Five Rivers' Runoff

| Parameter                             | Initial range | Units             | Type                 |
|---------------------------------------|---------------|-------------------|----------------------|
| Surface Temperature Adjustment Factor | -5~5          | -                 | Basin Variable       |
| Soil Temperature Adjustment Factor    | -5~5          | -                 | Basin Variable       |
| Maximum Soil Moisture Capacity        | 1~10          | mm                | Basin Variable       |
| Minimum Soil Moisture Capacity        | 0.5~5         | mm                | Basin Variable       |
| Percolation Index                     | 0~1           | -                 | Basin Variable       |
| Surface Runoff Lag Time               | 10~150        | days              | Basin Variable       |
| Groundwater Recharge Threshold        | 0~1           | mm                | HRU Variable         |
| Slope Factor                          | 0~100         | -                 | HRU Variable         |
| Maximum Canopy Storage Capacity       | 0.01~0.3      | mm                | HRU Variable         |
| Overland Flow Manning's Roughness     | 0~1           | -                 | HRU Variable         |
| Soil Evaporation Compensation Factor  | 0.1~1         | -                 | HRU Variable         |
| Plant Uptake Compensation Factor      | -0.3~0.3      | -                 | HRU Variable         |
| Curve Number Adjustment Factor        | -0.5~0.5      | -                 | Management Parameter |
| Biomixing Coefficient                 | -0.5~0.5      | -                 | Management Parameter |
| Soil Depth Adjustment Factor          | -0.5~0.5      | -                 | Management Parameter |
| Soil Bulk Density Adjustment          | -0.5~0.5      | g/cm <sup>3</sup> | Soil Parameter       |
| Available Water Capacity Adjustment   | -0.8~0.8      | mm                | Soil Parameter       |
| Hydraulic Conductivity Adjustment     | -0.5~0.5      | mm/d              | Soil Parameter       |
| Soil Albedo Adjustment Factor         | 0~500         | -                 | Soil Parameter       |
| Groundwater Delay Time                | 0~1           | days              | Groundwater Variable |
| Baseflow Alpha Factor                 | 0~1000        | -                 | Groundwater Variable |
| Minimum Groundwater Flow Threshold    | 0.02~0.2      | mm                | Groundwater Variable |
| Groundwater Re-evaporation Factor     | 0~500         | -                 | Groundwater Variable |
| Minimum Re-evaporation Threshold      | 0~1           | mm                | Groundwater Variable |
| Recharge Depth Adjustment Factor      | 0.01~0.3      | -                 | Groundwater Variable |
| Channel Manning's Roughness           | 0~300         | -                 | Channel Parameter    |
| Channel Diffusion Coefficient         | 0~1           | m/s               | Channel Parameter    |
